# Supplementary material
Source: HighWire-hosted journal article supplement (https://jmg.bmj.com/content/54/9/613)
Supplement: inline-supplementary-material-3 [file inline-supplementary-material-3.pdf]

**Table S3 Differential Diagnosis**

|                                                  | <u>Gene / Locus</u> | <u>Inheritance</u> | <u>Speech and language development</u>                                                         | <u>Neurologic development</u>                                                         |
|--------------------------------------------------|---------------------|--------------------|------------------------------------------------------------------------------------------------|---------------------------------------------------------------------------------------|
| <b>FOXP1-related ID syndrome</b>                 | FOXP1               | Autosomal dominant | Severe delayed speech development - Expressive language disorder - OMD - Articulation problems | ID - NMD                                                                              |
| <b>Speech-language disorder 1 (SPCH1)</b>        | FOXP2               | Autosomal dominant | DVD - OMD - Impaired processing and expression of language - Articulation defects              | Decreased nonverbal IQ                                                                |
| <b>Specific language impairment 1 (SLI1)</b>     | -                   | Multifactorial     | SLI - May affect language expression, reception, and/or articulation                           | Normal intelligence - No other neurologic deficits                                    |
| <b>Specific language impairment 2 (SLI2)</b>     | -                   | Multifactorial     | SLI - May affect language expression, reception, and/or articulation                           | Normal intelligence - No other neurologic deficits                                    |
| <b>Specific language impairment 3 (SLI3)</b>     | -                   | -                  | SLI                                                                                            | -                                                                                     |
| <b>Specific language impairment 4 (SLI4)</b>     | -                   | -                  | SLI                                                                                            | -                                                                                     |
| <b>Specific language impairment 5 (SLI5)</b>     | TM4SF20             | Autosomal dominant | SLI - Early speech delay - Communication defects                                               | GDD might be present - Others show normal cognitive function                          |
| <b>Familial developmental dysphasia</b>          | -                   | Autosomal dominant | Developmental dysphasia - Specific and severe delay in development of spoken language          | Normal intelligence                                                                   |
| <b>Distal chromosome 11p13 deletion syndrome</b> | -                   | Autosomal dominant | Speech and language delay                                                                      | Developmental delay - ID                                                              |
| <b>Phelan-Mcdermid syndrome (PHMDS)</b>          | SHANK3              | Isolated cases     | Absent or delayed speech development - Severe compromised expressive language development      | GDD - Moderate to severe ID - Generalized hypotonia                                   |
| <b>Floating-harbor syndrome (FLHS)</b>           | SRCAP               | Autosomal dominant | Expressive language delay                                                                      | Mild ID versus normal intelligence - Normal motor development                         |
| <b>Helmsloot-van der aa syndrome (HVDAS)</b>     | ADNP                | Autosomal dominant | Language impairment                                                                            | Developmental delay - Delayed psychomotor development - Hypotonia - Mild to severe ID |
| <b>Bainbridge-ropers syndrome (BRPS)</b>         | ASXL3               | -                  | Language impairment                                                                            | Severe psychomotor retardation                                                        |

|                                                  | <u>Behavioral trouble</u>                                                                                | <u>Craniofacial features</u>                                                                                                      | <u>Associated organ involvement</u>                                                                                 |
|--------------------------------------------------|----------------------------------------------------------------------------------------------------------|-----------------------------------------------------------------------------------------------------------------------------------|---------------------------------------------------------------------------------------------------------------------|
| <b>FOXP1-related ID syndrome</b>                 | Autistic behavior - ASD -<br>Aggression - Obsessions<br>Compulsions - Hyperactivity                      | Typical dysmorphic features                                                                                                       | CHD - Feeding difficulties - GTA -<br>Ophtalmological problems                                                      |
| <b>Speech-language disorder 1 (SPCH1)</b>        | -                                                                                                        | -                                                                                                                                 | -                                                                                                                   |
| <b>Specific language impairment 1 (SLI1)</b>     | -                                                                                                        | -                                                                                                                                 | -                                                                                                                   |
| <b>Specific language impairment 2 (SLI2)</b>     | -                                                                                                        | -                                                                                                                                 | -                                                                                                                   |
| <b>Specific language impairment 3 (SLI3)</b>     | -                                                                                                        | -                                                                                                                                 | -                                                                                                                   |
| <b>Specific language impairment 4 (SLI4)</b>     | -                                                                                                        | -                                                                                                                                 | -                                                                                                                   |
| <b>Specific language impairment 5 (SLI5)</b>     | ASD                                                                                                      | Normal facial appearance                                                                                                          | No associated congenital defects                                                                                    |
| <b>Familial developmental dysphasia</b>          | -                                                                                                        | -                                                                                                                                 | -                                                                                                                   |
| <b>Distal chromosome 11p13 deletion syndrome</b> | Autism                                                                                                   | -                                                                                                                                 | Congenital eye malformations -<br>Aniridia                                                                          |
| <b>Phelan-Mcdermid syndrome (PHMDS)</b>          | Autistic features - Poor social<br>interaction - Aggressive behavior -<br>Inappropriate chewing behavior | Normal to accelerated growth - Tall<br>stature - Macrocephaly - Typical<br>dysmorphic features versus normal<br>facial appearance | Feeding difficulties                                                                                                |
| <b>Floating-harbor syndrome (FLHS)</b>           | -                                                                                                        | Short stature - Typical dysmorphic<br>features (age-related)                                                                      | CHD (rare) - Umbilical hernia (rare) -<br>Celiac disease - GTA - Renal<br>abnormalities - Skeletal<br>abnormalities |
| <b>Helsmoortel-van der aa syndrome (HVDAS)</b>   | ASD - Obsessive-compulsive<br>behavior - Stereotypic behavior -<br>Hyperactivity                         | Short stature - Obesity - Typical<br>dysmorphic features                                                                          | CHD - Feeding difficulties - Joint<br>laxity                                                                        |
| <b>Bainbridge-ropers syndrome (BRPS)</b>         | Stereotypic behavior - Autistic<br>features                                                              | Severe postnatal growth retardation<br>- Dysmorphic features                                                                      | Feeding problems - Ulnar deviation<br>of hands                                                                      |
