# Supplementary material
Source: HighWire-hosted journal article supplement (https://jmg.bmj.com/content/54/9/613)
Supplement: inline-supplementary-material-4 [file inline-supplementary-material-4.docx]

**Table S1 Molecular Data**

Molecular data of 25 novel and 23 previously reported patients with *FOXP1* defects.

(dn = de novo; NA = not available)

**Table S2 Detailed Clinical Features**

Detailed clinical features of the 25 novel and 23 previously reported patients with *FOXP1* defects.

(nd = not documented; N = normal; + = present; - = absent; ↑ = increased; ↓ = decreased; NMD = neurmotor delay; ID = intellectual disability; OMD = oromotor dyspraxia; FTT = failure to thrive; PF = palpebral fissures; CHD = congenital heart defects; PDA = patent ductus arteriosus; ASD = atrial septum defect; PS = pulmonary stenosis; GTA = genitourinary tract abnormalities)

**Table S3 Differential Diagnosis**

Differential diagnosis of specific language impairment (SLI).

(DVD = developmental verbal dyspraxia; SLI = specific language impairment; OMD = oromotor dyspraxia; ID = intellectual disability; NMD = neuromotor delay; GDD = global developmental delay; ASD = autism spectrum disorder; CHD = congenital heart defects; GTA = genitourinary tract abnormalities)
